# Supplementary material for: Kinase inhibitor library screening identifies synergistic drug combinations effective in sensitive and resistant melanoma cells
Source: PubMed Central journal article supplement (PMC6364417; doi:10.1186/s13046-019-1038-x), 2019-02-06
Supplement: 13046_2019_1038_MOESM2_ESM.pdf [file 13046_2019_1038_MOESM2_ESM.pdf]

|                       | <b>A375</b>    | <b>A375-XP</b> | <b>A375-GP</b> | <b>IGR37</b> | <b>IGR37-XP</b> | <b>IGR37-GP</b> | <b>IGR39</b> | <b>501Mel</b> |
|-----------------------|----------------|----------------|----------------|--------------|-----------------|-----------------|--------------|---------------|
| <b>BRAF</b>           | V600E          | V600E          | V600E          | V600E        | V600E           | V600E           | V600E        | V600E         |
| <b>NRAS</b>           | wt             | G13R           | Q61K           | wt           | wt              | wt              | wt           | wt            |
| <b>NF1</b>            | wt             | wt             | wt             | wt           | wt              | wt              | wt           | ni            |
| <b>PTEN</b>           | wt             | wt             | wt             | wt           | wt              | wt              | wt           | wt            |
| <b>CDKN2A</b>         | E69X E61X W66R | E69X E61X W66R | E69X E61X W66R | wt           | wt              | wt              | wt           | ni            |
| <b>TP53</b>           | wt             | wt             | wt             | C229fs*10    | C229fs*11       | C229fs*12       | C229fs*12    | wt            |
| <b>AURKB</b>          | wt             | wt             | wt             | F88L         | F88L            | F88L            | F88L         | ni            |
| <b>AURKA</b>          | I57V           | I57V           | I57V           | I57V         | I57V            | I57V            | I57V         | ni            |
| <b>CHEK1</b>          | I471V          | I471V          | I471V          | I471V        | I471V           | I471V           | I471V        | ni            |
| <b>CHEK2</b>          | wt             | wt             | wt             | wt           | wt              | wt              | wt           | ni            |
| <b>WEE1</b>           | wt             | wt             | wt             | A98T         | A98T            | A98T            | A98T         | ni            |
| <b>PTK2 (FAK)</b>     | wt             | wt             | wt             | wt           | wt              | wt              | wt           | ni            |
| <b>MAP2K1 (MEK)</b>   | wt             | wt             | wt             | wt           | wt              | wt              | wt           | ni            |
| <b>PLK1</b>           | wt             | wt             | wt             | wt           | wt              | wt              | wt           | ni            |
| <b>PRKDC (DNA-PK)</b> | wt             | wt             | wt             | wt           | wt              | wt              | wt           | ni            |
| <b>CDK1</b>           | wt             | wt             | wt             | wt           | wt              | wt              | wt           | ni            |
| <b>PIK3CA</b>         | wt             | wt             | wt             | wt           | wt              | wt              | wt           | ni            |
| <b>PIK3CB</b>         | wt             | wt             | wt             | wt           | wt              | wt              | wt           | ni            |
| <b>PIK3CC</b>         | wt             | wt             | wt             | wt           | wt              | wt              | wt           | ni            |
| <b>PIK3CD</b>         | wt             | wt             | wt             | wt           | wt              | wt              | wt           | ni            |
| <b>PIK3R1</b>         | wt             | wt             | wt             | wt           | wt              | wt              | wt           | ni            |

wt: no mutation detected

ni: no information
