# Supplementary material for: Kinase inhibitor library screening identifies synergistic drug combinations effective in sensitive and resistant melanoma cells
Source: PubMed Central journal article supplement (PMC6364417; doi:10.1186/s13046-019-1038-x), 2019-02-06

# Additional Figure 5

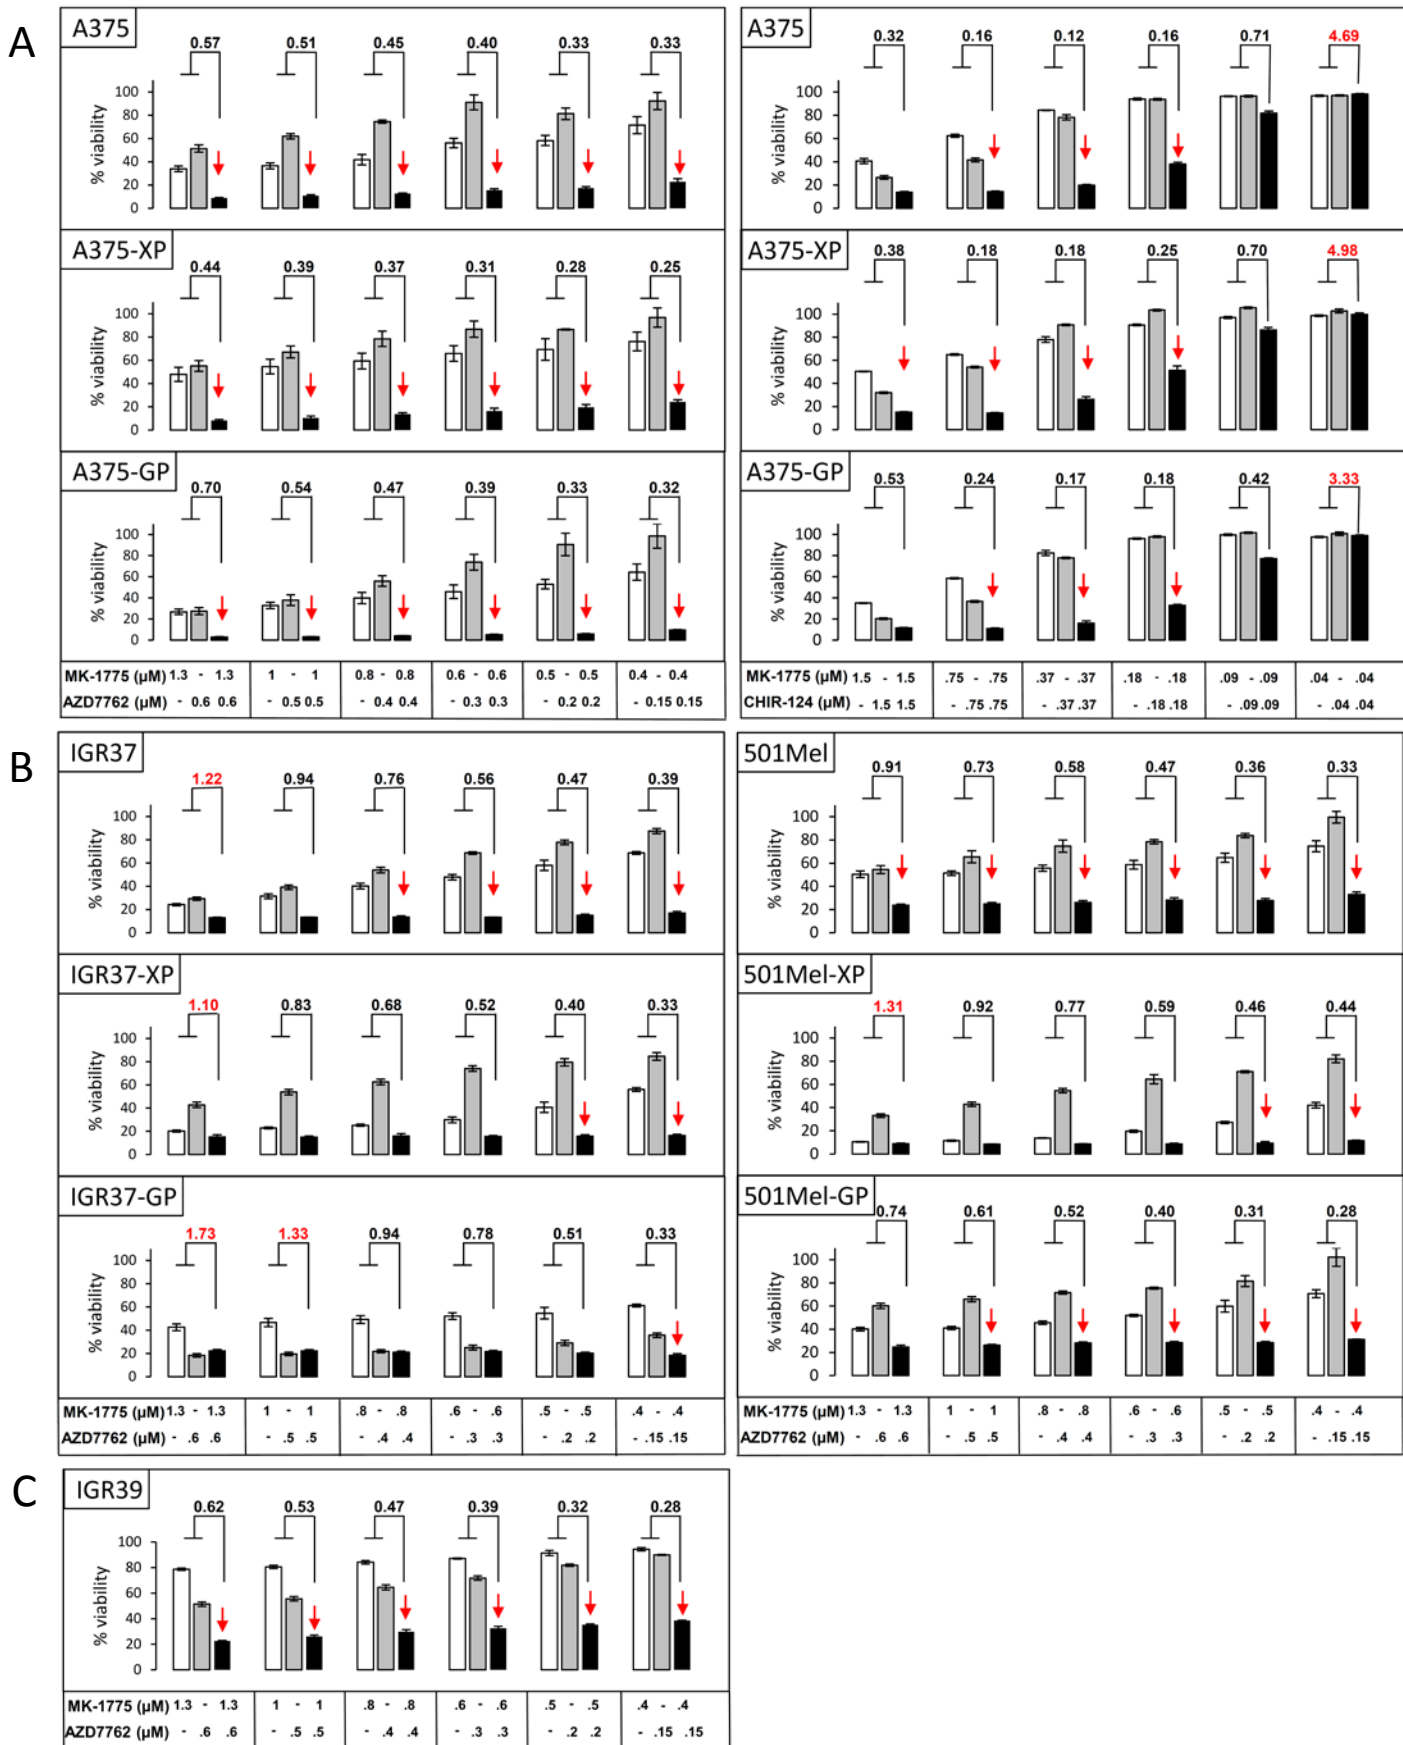

Supplement: 13046_2019_1038_MOESM7_ESM.pdf [file 13046_2019_1038_MOESM7_ESM.pdf]
